## Solving the trade-off by differences in handling of intracellular $K^+$ : why substrate translocation by the dopamine transporter but not by the serotonin transporter is voltage-dependent

Shreyas Bhat<sup>\*1</sup>, Marco Niello<sup>\*1</sup>, Klaus Schicker<sup>2</sup>, Christian Piffl<sup>3</sup>, Harald H. Sitte<sup>1</sup>, Michael Freissmuth<sup>1</sup>, Walter Sandtner<sup>1‡</sup>

Affiliations: <sup>1</sup>Institute of Pharmacology and the Gaston H. Glock Research Laboratories for Exploratory Drug Development, Center of Physiology and Pharmacology, Medical University of Vienna, Vienna, Austria; <sup>2</sup>Division of Neurophysiology and Neuropharmacology, Centre for Physiology and Pharmacology, Medical University of Vienna, Vienna, Austria. <sup>3</sup> Center for Brain Research, Medical University of Vienna, Vienna, Austria.

\*S. Bhat and M. Niello contributed equally to this paper.

‡Correspondence: Walter Sandtner ([walter.sandtner@meduniwien.ac.at](mailto:walter.sandtner@meduniwien.ac.at))

### Abstract

The dopamine transporter (DAT) retrieves dopamine into presynaptic terminals after synaptic release. The concentrative power of DAT is thought to be fueled by the transmembrane  $Na^+$  gradient, but it is conceivable that DAT can also rely on other energy sources, e.g. membrane voltage and/or the  $K^+$  gradient. Here, we recorded uptake of dopamine or the fluorescent substrate APP<sup>+</sup> ((4-(4-dimethylamino)phenyl-1-methylpyridinium) in DAT-expressing cells under voltage control. We show that DAT differs substantially from the closely related serotonin transporter (SERT): substrate uptake by DAT was voltage-dependent, intracellular  $K^+$  binding to DAT was electrogenic but transient in nature thus precluding antiport of  $K^+$  by DAT. There is a trade-off between maintaining constant uptake and harvesting membrane potential for concentrative power. Based on our observations, we conclude that subtle differences in the kinetics of co-substrate ion binding allow closely related transporters to select between voltage-independent uptake and high concentrative power.

### Introduction

The serotonin transporter (SERT) and the dopamine transporter (DAT) are members of the solute carrier 6 family (SLC6). In the brain, SERT and DAT mediate reuptake of released serotonin and dopamine, respectively, into the presynaptic specialization neurons (*Kristensen et al., 2011*). By this action, they terminate monoaminergic signaling and - in concert with the vesicular monoamine transporters - replenish vesicular stores. The two transporters are secondary active in nature; they utilize the free energy contained in the transmembrane  $Na^+$  gradient (established by the  $Na^+/K^+$  pump) to drive concentrative monoamine uptake into cells in which they are expressed (*Burtscher et al., 2019*). SLC6 transporters are believed to operate via the alternate access mechanism wherein they endure a closed loop of partial reactions constituting a complete transport cycle (*Jardetzky, 1966; Rudnick and Sandtner, 2019*). These partial reactions require conformational rearrangements and binding/unbinding reactions of substrate and co-substrate ions. It is gratifying to note that crystal structures obtained from the prokaryotic homolog LeuT, drosophila DAT and human SERT itself support the general concept of alternate access (*Yamashita et al., 2005; Penmatsa et al., 2013; Coleman et al., 2016*). These crystal structures also reveal SERT and DAT to be closely related structurally. This is evident from the root mean square deviation, which differs by only approximately 1 Å between the outward facing structure of human SERT and drosophila DAT. SERT and DAT also share a rich and partially overlapping pharmacology (*Sitte and Freissmuth, 2015*): there are many inhibitors, which are used for the treatment of neuropsychiatric disorders (major

depression, general anxiety disorder and attention-deficit hyperactivity disorder), are highly selective for either transporter, but many illicit drugs, which induce reverse transport, target both, DAT and SERT (Hasenhuettl et al., 2019; Niello et al., 2020).

Despite their similarity in structure and function, the two transporters differ in many more aspects than just ligand recognition: the transport stoichiometry of SERT and DAT is considered to be electroneutral and electrogenic, respectively. It has long been known that SERT antiports intracellular  $K^+$  (Rudnick and Nelson, 1978); for DAT, on the other hand, intracellular  $K^+$  is thought to be immaterial (Sonders et al., 1997; Erreger et al., 2008). If true, only SERT can utilize the chemical potential of the cellular  $K^+$  gradient to establish and maintain a substrate gradient. It has therefore remained enigmatic, why closely related transporters can differ so fundamentally in their stoichiometry and their kinetic decision points. In this context, it is worth pointing out that the effects of intracellular  $K^+$  ( $K_{in}^+$ ), intracellular  $Na^+$  ( $Na_{in}^+$ ) and membrane voltage on the transport cycle of SERT have been recently analyzed in great detail (Hasenhuettl et al., 2016). However, much less is known on how these factors definitively impinge on the transport cycle of DAT (Sonders et al., 1997; Hoffman et al., 1999; Prasad and Amara, 2001; Erreger et al., 2008; Li et al., 2015). In this study, we investigated the role of intracellular  $K^+$  and voltage on substrate transport through DAT. To this end, we coupled direct measurements of substrate induced currents with simultaneous recordings of uptake of the fluorescent substrate APP<sup>+</sup> (4-(4-dimethylamino)phenyl-1-methylpyridinium) into single HEK293 cells expressing DAT under voltage control. These measurements were conducted in the whole cell patch clamp configuration, which allowed for control of the intra- and extracellular ion composition via the electrode and bath solution, respectively. Our analysis revealed that  $K_{in}^+$  did bind to the inward facing state of DAT but - in contrast to SERT -  $K_{in}^+$  was released prior the return step from the substrate free inward to the substrate free outward facing conformations. We also found that substrate uptake by DAT, unlike SERT, was voltage-dependent in the presence of  $K_{in}^+$ . Moreover, the absence of  $K_{in}^+$  had no appreciable effect on the transport rate of DAT. The transient nature of  $K_{in}^+$  binding was incorporated into a refined kinetic model, which highlights the differences between SERT and DAT. Notably, this model allows for a unifying description, which attributes all existing functional differences between SERT and DAT to the difference in the handling of  $K_{in}^+$ .

## Experimental procedures

### Cell culture

Human embryonic kidney 293 (HEK293) cells were grown in Dulbecco's Modified Eagle Medium, 10% heat-inactivated fetal bovine serum and 50 mg/l gentamicin on 60 or 100 mm tissue culture dishes (Falcon) at 37°C and 5% CO<sub>2</sub>/95% air. For stable expression of human DAT in HEK cells the expression vector pRc/CMV was used as described previously (Sitte et al., 1998).

### Whole cell patch clamping

Whole cell patch clamp experiments were performed on HEK293 cells stably expressing DAT. Twenty-four hours prior to patching, the cells were seeded at low density on PDL coated 35 mm plates. Substrate-induced DAT currents were recorded under voltage clamp. Cells were continuously superfused with a physiological external solution that contains 140 mM NaCl, 2.5 mM CaCl<sub>2</sub>, 2 mM MgCl<sub>2</sub>, 20 mM glucose, and 10 mM HEPES (pH adjusted to 7.4 with NaOH, final Na<sup>+</sup> concentration was 146 mM). Pipette solution mimicking the internal ionic composition of a cell (referred to as normal internal solution henceforth, used in Fig.1, Fig. 2, Fig. 5D) contained 133 mM potassium gluconate, 6 mM NaCl, 1 mM CaCl<sub>2</sub>, 0.7 mM MgCl<sub>2</sub>,

10 mM HEPES, 10 mM EGTA (pH adjusted to 7.2 with KOH, final  $K_{in}^+$  concentration 160 mM). A low  $Cl^-$  internal solution (Fig. 5G, 5H- final  $Cl^-$  concentration 0.5 mM) was made by replacing  $CaCl_2$  and  $MgCl_2$  in normal internal solution by  $CaMES_2$  (MES - 2-(N-morpholino)ethanesulfonic acid) and Mg-Acetate, respectively and 5.5 mM of NaCl with NaMES. A high  $Cl^-$  internal solution was made by replacing potassium gluconate in the normal internal solution with KCl (Fig. 5G, 5H – final  $Cl^-$  concentration 142.4 mM). A  $Na_{in}^+$  and  $K_{in}^+$ -free internal solution (Fig. 3D, Fig. 3F, Fig. 4A-G, Fig. 5E) was made by replacing NaCl and potassium gluconate in the normal internal solution with equimolar concentrations of NMDG chloride (titrated to pH of 7.2 using NMDG). A  $Na_{in}^+$ -free 160 mM  $K_{in}^+$  internal solution (Fig.4B, Fig.4D, Fig. 4E, Fig.4F, Fig.5A-B, Fig.5F) was made by replacing NaCl with NaMES (titrated to pH of 7.2 with KOH; final  $K^+$  concentration 160 mM). An internal solution with high NaCl (used in Fig. 3A-C, Fig.3E, Fig.3F) was made by replacing potassium gluconate of the normal internal solution with equimolar concentration of NaCl (pH adjusted to 7.2 with NaOH; final  $Na^+$  concentration 160 mM). A high  $Li^+$  internal solution was made by replacing potassium gluconate in the normal internal solution with 133 mM of LiCl (pH adjusted to 7.2 with LiOH, Fig. 5C; final  $Li^+$  concentration 160 mM). Currents elicited by dopamine or  $APP^+$ , a fluorescent substrate of DAT (IDT307, Sigma Aldrich), were measured at room temperature (20-24°C) using an Axopatch 200B amplifier and pClamp 10.2 software (MDS Analytical Technologies). Dopamine or  $APP^+$  was applied using a DAD-12 superfusion system and a 4-tube perfusion manifold (ALA Scientific Instruments), which allowed for rapid solution exchange. Current traces were filtered at 1 kHz and digitized at 10 kHz using a Digidata 1550 (MDS Analytical Technologies). Current amplitudes and accompanying kinetics in response to substrate application were quantified using Clampfit 10.2 software (Molecular Devices). Passive holding currents were subtracted, and the traces were filtered using a 100-Hz digital Gaussian low-pass filter.

### Fluorescence recordings

Twenty-four hours prior to fluorescence recording, HEK293 cells stably expressing DAT were seeded at low density on PDL-coated 35 mm glass bottom dishes, which have a cover glass (Cellview Cell Culture Dish, Greiner Bio-One GmbH; Germany). On the day of the experiment, individual cells were visualized and patched using a 100x oil-immersion objective.  $APP^+$ , a fluorescent substrate of DAT that has an excitation range from 420-450 nm in polar solvents, was applied to single cells using a perfusion manifold in physiological external solution for 5 seconds at room temperature (20-24°C).  $APP^+$  uptake into the cell was measured using a LED lamp emitting 440 nm light and a dichroic mirror that reflected the light onto the cells. The emitted fluorescence from the sequestered  $APP^+$  within the cell was measured using a photomultiplier tube (PMT2102, Thorlabs, United States) mounted on the microscope after it had passed an emission filter (510-530 nm). The signal from the PMT was filtered at 3 kHz, digitized at 10 kHz with an Axon Digidata 1550B and pClamp 10.2 software (MDS Analytical Technologies). The signals (i.e. currents and fluorescence) were acquired with separate channels.

### Kinetic modeling and statistics

The kinetic model for the DAT transport cycle is based on previously reported sequential binding models for DAT (Erreger et al., 2008) and SERT (Hasenhuetl et al., 2016). State occupancies was calculated by numerical integration of the resulting system of differential equations using the Systems Biology Toolbox (Schmidt and Jirstrand, 2006) and MAT LAB 2017a software (Mathworks). The voltage dependence of individual partial reactions was modeled assuming a symmetric barrier as  $k_{ij} = k_{ij}^0 e^{-zQ_{ij}FV/2RT}$ , where  $F = 96,485 \text{ C}\cdot\text{mol}^{-1}$ ,  $R = 8.314 \text{ JK}^{-1}\text{mol}^{-1}$ ,  $V$  is the membrane voltage in volts, and  $T = 293 \text{ K}$  (Läuger, 1991).

Coupled membrane currents upon application of substrate were calculated as  $I = -F \times NC / N_A \times \sum z_{Qij} (p_i k_{ij} - p_j k_{ji})$ , where  $z_{Qij}$  is the net charge transferred during the transition,  $NC$  is the number of transporters ( $4 \times 10^6$ /cell), and  $N_A = 6.022 \times 10^{23}$ /mol. The substrate-induced uncoupled current was modeled as a current through a  $\text{Na}^+$ -permeable channel with  $I = P_o \gamma NC (V_M - V_{rev})$ , where  $P_o$  corresponds to the occupancy of the channel state,  $\gamma$  is the single-channel conductance of 2.4 pS,  $V_M$  is the membrane voltage, and  $V_{rev}$  is the reversal potential of  $\text{Na}^+$  (+ 100 mV). The extracellular and intracellular ion concentrations were set to the values used in the respective experiments. To account for the non-instantaneous onset of the substrate in patch-clamp experiments, we modeled the substrate application as an exponential rise with a time constant of 10 ms. Uptake of  $\text{APP}^+$  was modeled as  $T_i \text{ClS} * k_{off} S_{in} - T_i \text{Cl} * k_{on} S_{in} * S_{in} * NC / N_A$ , where  $T_i \text{ClS}$  and  $T_i \text{Cl}$  are the respective state occupancies,  $k_{on} S_{in}$  and  $k_{off} S_{in}$  are the association and dissociation rate constants of  $\text{APP}^+$  and  $S_{in}$  is the intracellular concentration of  $\text{APP}^+$ .

Experimental variations are either reported as means  $\pm$  95% confidence intervals, means  $\pm$  SD, or means  $\pm$  SEM. Current voltage relations were fit to a Boltzmann equation ( $I = \text{Bottom} + ((\text{Bottom} - \text{Top}) / (1 + \exp((V_{50} - V_M) / \text{slope})))$ ), where  $I$  is the current,  $\text{Bottom}$  and  $\text{Top}$  the lower level (i.e. maximal current amplitude of the inwardly directed current at negative potentials) and higher level (i.e. maximal current amplitude of the inwardly directed current at positive potentials), respectively and  $V_{50}$  the potential at which the current amplitude is half of the span between  $\text{Bottom}$  and  $\text{Top}$ . The valence ( $z$ ) was calculated from the slope:  $z = (R * T / \text{slope}) * F$

## Results

### Cellular $\text{APP}^+$ uptake via DAT is voltage dependent

$\text{APP}^+$ , a fluorescent analog of  $\text{MPP}^+$  (1-methy-4-phenylpyridinium), is a substrate of SERT and DAT (*Solis Jr. et al., 2012*).  $\text{APP}^+$  uptake into DAT expressing cells can be monitored with high temporal resolution by the detection of the light emitted by sequestered  $\text{APP}^+$ . Here we explored the feasibility of measuring  $\text{APP}^+$  uptake into a single cell under voltage control by employing a photomultiplier tube and a patch clamp amplifier, respectively. In Fig. 1, we show representative traces obtained from a HEK293 cell stably expressing DAT (Fig. 1A) and from an empty HEK293 cell (Fig. 1B). The cells were clamped to -60 mV in the whole cell configuration and exposed to increasing  $\text{APP}^+$  concentrations (i.e. 3  $\mu\text{M}$ , 10  $\mu\text{M}$ , 30  $\mu\text{M}$ , 100  $\mu\text{M}$ , 300  $\mu\text{M}$  and 600  $\mu\text{M}$ ) with a rapid superfusion device for 5 seconds. On  $\text{APP}^+$  application, the fluorescence intensity rose linearly in DAT cells but remained at a constant level in control cells after both cell types show a fast and concentration dependent initial rise in fluorescence. On terminating  $\text{APP}^+$  application, the fluorescence intensity in control cells decayed fully to baseline values. In DAT cells, the fluorescence intensity also initially decreased upon  $\text{APP}^+$  removal, but settled at values above the original baseline. We surmise that the fast rise in fluorescence reports on reversible  $\text{APP}^+$  binding to the plasma membrane. The slow and linear increase in fluorescence, seen only in DAT cells, reflects transporter mediated  $\text{APP}^+$  uptake. Slopes were estimated by linear regression of the slow phase of fluorescence increase in DAT-expressing cells (dashed lines in Fig. 1A). These slopes have the dimension of a rate (i.e. fluorescence  $\cdot \text{s}^{-1}$ ) and are hence a suitable readout for the uptake rate of  $\text{APP}^+$ . We normalized the slopes to those obtained at the highest concentration of  $\text{APP}^+$  tested (600  $\mu\text{M}$ ) to allow for comparison between individual cells. When plotted as a function of the applied  $\text{APP}^+$  concentration, these normalized slopes conformed to the Michaelis-Menten equation (Fig. 1C, solid black line): a  $K_M$  of 28  $\mu\text{M}$  (95% confidence interval 21 - 35  $\mu\text{M}$ ) was estimated by fitting the data to a rectangular hyperbola. We applied  $\text{APP}^+$  at a concentration below  $K_M$  (10  $\mu\text{M}$ ) to DAT-expressing cells for 15 seconds at different membrane voltages.

It is evident from the representative traces shown in Fig. 1D that the slope of fluorescence increase - i.e. the rate of APP<sup>+</sup> uptake - was highest at - 60 mV and progressively decreased at - 30 mV and 0 mV. In the control cell, changes in voltage did not affect background APP<sup>+</sup> binding (data not shown). In Fig. 1E, we plotted the normalized slopes induced by 10 μM APP<sup>+</sup> recorded over a voltage range spanning - 90 mV to + 40 mV. The data show that APP<sup>+</sup> uptake through DAT was voltage-dependent: the rate of APP<sup>+</sup> uptake declined at more positive potentials. A fit to the Boltzmann equation (solid line in Fig. 1E) allowed for estimating the valence associated with the transport of APP<sup>+</sup>: we obtained a value of 1.3 (95% confidence interval: 0.9 - 2.2).

### **Substrate induced currents via DAT are voltage-dependent**

Application of endogenous or synthetic substrates elicits a current through DAT, which can be recorded in the whole-cell patch-clamp configuration (*Sonders et al., 1997; Sitte et al., 1998; Erreger et al., 2008; Li et al., 2015*). Rapid substrate application (i.e. solution exchange rate > 10 s<sup>-1</sup>) allows for resolving two current components in the presence of physiological ionic gradients: (i) an initial peak - and (ii) a steady state current, which are both inwardly directed (*Erreger et al., 2008; Li et al., 2015*). The steady state current persists as long as the substrate is present but deactivates to baseline upon its removal. This is illustrated in Fig. 2A for dopamine, the cognate substrate of DAT, when applied at a saturating concentration (30 μM). APP<sup>+</sup> also evoked peak and steady-state currents, but the peak current was absent at concentrations below 30 μM (Fig. 2B). This can be rationalized by taking into account that APP<sup>+</sup> is a low affinity substrate of DAT (see also below, kinetic model section): a K<sub>M</sub> value of 22 μM (95% confidence interval: 13 - 30 μM) was calculated from the saturation curve (blue line in Fig. 2C). For the sake of comparison, the dashed line in Fig. 2C also shows the saturation curve from Fig. 1C (i.e. normalized slopes of the slow rise in APP<sup>+</sup> fluorescence): there was an excellent agreement between the APP<sup>+</sup> uptake and the amplitude of the APP<sup>+</sup>-induced steady current, which confirms that APP<sup>+</sup>-induced currents are transport-associated, that is they reflect the rate of APP<sup>+</sup> uptake. We note, however, that the average current amplitude at saturation was approximately half of that obtained at a saturating dopamine concentration. We also assessed the voltage-dependence (solid blue line in Fig. 2D) of the steady current amplitude at a saturating APP<sup>+</sup> (600 μM): the amplitude of the steady currents decreased at positive potentials. The estimated valence for APP<sup>+</sup> extracted from the fits to the Boltzmann equation was again 1.3. The dashed line in Fig. 2D is the sign-inverted fit to the data shown in Fig. 1E for the rate of APP<sup>+</sup> uptake. It is evident that two voltage relations are similar.

### **Na<sup>+</sup> binding to the inward facing conformation of DAT is voltage-dependent**

Substrate transport through Na<sup>+</sup> dependent transporters is predicted to be impeded at elevated intracellular Na<sup>+</sup> concentrations: completion of the transport cycle is contingent on cytosolic release of Na<sup>+</sup> and substrate, but at high intracellular Na<sup>+</sup> concentrations the ion binding site will remain occupied due to rebinding of Na<sup>+</sup>. As a consequence, the transporter cannot progress through the transport cycle, which must result in reduced substrate uptake (*Khoshbouei et al., 2003; Erreger et al., 2008; Schicker et al., 2012; Hasenhuettel et al., 2015; Hasenhuettel et al., 2016*). We verified this prediction by measuring APP<sup>+</sup> (10 μM) uptake into DAT expressing cells under voltage control using different intracellular patch pipette solutions. The representative traces in Fig. 3A show uptake of APP<sup>+</sup> into a cell, in which the concentration of Na<sub>in</sub><sup>+</sup> was 160 mM and the voltage was held at - 90 mV, - 60 mV, - 30 mV, 0 mV and 30 mV. Normalized recordings (slope at - 90 mV = 1) from 9 experiments are summarized in Fig. 3B. Surprisingly, we found that APP<sup>+</sup> was transported by DAT at negative potentials despite the presence of 160 mM Na<sub>in</sub><sup>+</sup>. In Fig. 3C,

we compared the slopes of 9 cells, in which  $\text{Na}_{\text{in}}^+$  was either 6 mM (i.e., normal internal solution) or 160 mM and the membrane potential was clamped at -90 mV and -30 mV. It is evident from this comparison that the high intracellular  $\text{Na}^+$  concentration inhibited  $\text{APP}^+$  uptake at both potentials. However, our data also show that the inhibitory effect of intracellular  $\text{Na}^+$  is lesser at negative voltages (Fig. 3B). This indicates that  $\text{Na}^+$  binding to the inward facing conformation is voltage-dependent, rendering the  $\text{Na}_{\text{in}}^+$  affinity lower at negative potentials.

We explored this conjecture by measuring the dopamine-induced peak current amplitude of DAT as a function of voltage with intracellular solutions containing either 160 mM  $\text{Na}_{\text{in}}^+$  or 0 mM  $\text{Na}_{\text{in}}^+$ , respectively. In Fig. 3D and Fig. 3E, we show representative current traces for both conditions (i.e. 0 mM  $\text{Na}_{\text{in}}^+$  in Fig. 3D, 160 mM  $\text{Na}_{\text{in}}^+$  in Fig. 3E). In Fig. 3F, we plotted the normalized peak current voltage relations ( $n = 6$ ). The blue (0  $\text{Na}_{\text{in}}^+$ ) and black lines (160 mM  $\text{Na}_{\text{in}}^+$ ) were drawn by fitting the data points to the Boltzmann equation. The peak current amplitude changed with voltage in both conditions. More importantly, we found the slope of the current voltage relation to be steeper in the absence of  $\text{Na}_{\text{in}}^+$  (open circles) than in the presence of 160 mM  $\text{Na}_{\text{in}}^+$  (open squares). This action of  $\text{Na}_{\text{in}}^+$  can be explained as follows: the transition of substrate and  $\text{Na}^+$ -loaded transporter from the outward to the inward facing conformation leads to the opening of the inner vestibule and access to the intracellular bulk solution. This creates an exit path for  $\text{Na}^+$  and hence to its intracellular dissociation. Because the  $\text{Na}^+$  binding site resides within the electric field, the dissociating  $\text{Na}^+$  ions give rise to an inwardly directed current. At 160 mM  $\text{Na}_{\text{in}}^+$  concentrations, however,  $\text{Na}^+$  is expected to rebind producing an outwardly directed current that reduces the net-charge of the inwardly directed peak current. This results in a diminished voltage dependence. The valences extracted from the Boltzmann fit were 1.22 and 0.39 in 0 mM and 160 mM  $\text{Na}_{\text{in}}^+$  conditions, respectively. Notably, the difference between these two values was 0.83, which is slightly less than 1. This suggests that DAT releases one  $\text{Na}^+$  ion into the cytosol in each cycle.

### **$\text{K}_{\text{in}}^+$ mediates uncoupled currents in DAT but does not influence substrate uptake**

A recent DAT model considers DAT-mediated currents to be fully coupled to substrate transport (*Erreger et al., 2008*). However, there is experimental evidence suggesting that the dopamine-induced current is, in part, produced by an uncoupled ion flux (*Sonders et al., 1997; Sitte et al., 1998; Carvelli et al., 2004*). SERT was shown to carry an uncoupled current, which is contingent on the presence of intracellular  $\text{K}^+$  (*Adams and DeFelice, 2003; Schicker et al., 2012*). We investigated, if such a current also exists in DAT. Accordingly, we recorded dopamine-induced currents in the presence and absence of  $\text{K}_{\text{in}}^+$ . In Fig. 4A, we show a representative current trace obtained from a DAT-expressing cell, which was evoked by the application of 30  $\mu\text{M}$  dopamine in the absence of  $\text{K}_{\text{in}}^+$ . The currents recorded in the absence of  $\text{K}_{\text{in}}^+$  were not markedly different from those evoked with physiological intracellular  $\text{K}^+$  concentrations (*cf.* Fig. 2A). However, when we plotted the average current amplitude and the voltage dependence thereof, we found that the currents were smaller in the absence of any  $\text{K}_{\text{in}}^+$  (open triangles;  $n = 12$ , solid blue line in Fig. 4B) than in the presence of 160 mM  $\text{K}_{\text{in}}^+$  (open squares;  $n = 12$ , solid black line in Fig. 4B). Differences in current amplitudes between these two conditions only reached statistical significance at potentials more positive than -60 mV. Accordingly, we show a comparison at -20 mV in the inset of Fig. 4B ( $n = 12$  cells for each condition,  $p = 0.003$ ).

In a recent study, we showed that SERT completed the transport cycle faster in the presence than in the absence of intracellular  $\text{K}^+$  (*Hasenhuetl et al., 2016*). If the same was true for DAT, it could explain the larger current amplitudes observed with physiological  $\text{K}_{\text{in}}^+$  concentrations. We tested this notion by relying

on a 'two-pulse' protocol (schematic representation in Fig. 4C): a saturating concentration of dopamine (i.e. 30  $\mu\text{M}$ ) was applied for 1 second as a first pulse. This reference pulse will force all available transporters into the transport cycle. This is followed by a second test pulse of 30  $\mu\text{M}$  dopamine for 1 second. If all transporters dwell in the transport cycle, where they adopt conformations that cannot bind extracellular substrate, the test pulse will fail to evoke a peak current. However, with increasing time intervals between the reference and the test pulse, more transporters will return to the initial state and bind substrate again to produce a peak current. Accordingly, the rate of peak current recovery is a measure of the rate by which the transporter returns to the resting state (i.e. the sodium bound outward facing conformation -  $T_0\text{Na}$ ). Fig. 4C and 4D show representative original traces recorded at - 50 mV and the average time-dependent recovery of the peak current, respectively. It is evident from the time-course of peak current recovery was comparable in the presence (squares in Fig. 4D) and absence of intracellular  $\text{K}^+$  (circles in Fig. 4D). Thus,  $\text{K}_{\text{in}}^+$  did not accelerate the recovery of the peak current in DAT. The tested ionic condition biases DAT into the forward direction, where the peak recovery rate becomes a measure of the rate of substrate uptake (cycle turnover rate). These data, therefore, suggest that the rate of substrate uptake is not affected by  $\text{K}_{\text{in}}^+$ . We further validated this conclusion by assessing uptake of  $\text{APP}^+$  in the presence and absence of intracellular  $\text{K}^+$ : representative traces of  $\text{APP}^+$  uptake by DAT expressing cells, which were filled with internal solutions containing either 0 mM or 160 mM  $\text{K}_{\text{in}}^+$  and clamped to -60 mV, are shown in the upper and lower panel, respectively, of Fig. 4E. Based on recordings from 14 cells each (Fig. 4F), it is evident that  $\text{APP}^+$  uptake was independent of  $\text{K}_{\text{in}}^+$  concentrations. In Fig.4G we show the normalized slope of the  $\text{APP}^+$  induced rise in fluorescence in the absence of  $\text{K}_{\text{in}}^+$  at - 90 mV, - 60 mV, - 30 mV, 0 mV and + 30 mV (open circles). For comparison we plotted the fit of the data in Fig.1E (160 mM  $\text{K}_{\text{in}}^+$ -dashed line). The two voltage dependencies are in reasonable agreement, in further support of the idea that substrate uptake is unaffected by  $\text{K}_{\text{in}}^+$ .

### **$\text{K}_{\text{in}}^+$ binds to the inward facing conformation of DAT.**

Our data indicate that  $\text{K}_{\text{in}}^+$  does not accelerate substrate uptake by DAT but gives rise to uncoupled currents, which add up to currents coupled to substrate transport. The latter finding is difficult to explain if  $\text{K}_{\text{in}}^+$  does not interact with DAT. We tested if  $\text{K}_{\text{in}}^+$  did indeed bind to DAT by examining the voltage-dependence of peak current amplitudes elicited by dopamine application in the presence of 160 mM  $\text{K}_{\text{in}}^+$ . Representative current traces are shown in Fig. 5A and the normalized peak current amplitudes are plotted as a function of voltage in Fig. 5B: the green solid line represents the fit of the data points to the Boltzmann equation. The slope of the current voltage relation at 160 mM  $\text{K}_{\text{in}}^+$  was much shallower than at 0 mM  $\text{K}_{\text{in}}^+$  (for comparison see dashed line, which corresponds to the fit extracted from Fig. 3F, i.e. with 0 mM  $\text{Na}_{\text{in}}^+$ / 0 mM  $\text{K}_{\text{in}}^+$  in the internal solution). The question, however, is whether the observed slope change does indeed reflect binding of  $\text{K}_{\text{in}}^+$  to DAT. Alternatively, it may simply result from transient occupation of the inner vestibule by  $\text{K}_{\text{in}}^+$ , because upon opening of the inner vestibule the newly available space becomes occupied by water and possibly also by ions. Occupation of the inner vestibule by  $\text{K}_{\text{in}}^+$  may suffice to produce an outwardly directed transient current and thereby diminish the voltage-dependence of the peak current. It is possible to discriminate between these two possibilities by replacing  $\text{K}_{\text{in}}^+$  with equimolar concentration of  $\text{Li}_{\text{in}}^+$  (i.e. 160 mM  $\text{Li}^+$ ). It is evident from the results shown in Fig. 5C that  $\text{Li}^+$  did not affect the slope in any appreciable way (compare orange solid line in Fig. 5C with the blue dashed line in Fig. 5B). The black and green dashed lines in Fig. 5C were taken from Fig. 3F (152 mM  $\text{Na}_{\text{in}}^+$ ) and Fig. 5B (160 mM  $\text{K}_{\text{in}}^+$ ), respectively, to illustrate the difference. This observation supports the argument that the slope change is indicative of specific  $\text{K}_{\text{in}}^+$  binding to DAT and not transient occupancy of the inner vestibule

of DAT by monovalent cations. In fact,  $K_{in}^+$  binding to the inward-facing conformation of DAT provides an explanation for the observation that steady-state current amplitudes were larger in the presence than in the absence of intracellular  $K^+$  (see Fig. 4B). We note that the slope of the current voltage relation with high intracellular  $K_{in}^+$  was similar to the slope observed in the presence of high intracellular  $Na^+$  (dashed lines in Fig.5C). This suggests that  $K_{in}^+$  can reach the site, which  $Na_{in}^+$  has dissociated from. We speculate that this site is the  $Na_2$  site.

### Expanding the two-pulse protocol to confirm the voltage-dependence of dopamine uptake by DAT

We used the “two-pulse protocol” (*cf.* Fig. 3C) under different intracellular ionic conditions and membrane voltages to obtain complementary insights into the voltage-dependence of dopamine transport through DAT. Fig. 5D shows the time course of peak current recovery determined at three potentials (i.e. - 50 mV, 0 mV, + 20 mV). These were measured in the presence of a physiological intra- and extracellular ionic gradients (160 mM  $K_{in}^+$ , 6 mM  $Na_{in}^+$ ). It is evident that the rate by which DAT returned to the resting state ( $T_0Na$ ) was voltage-dependent and that it was accelerated at positive potentials. This is indicative of a lower cycle completion rate in the physiological forward transport mode and of an increased likelihood for return of the transporters to the resting state with the substrate bound via the exchange mode. We also measured the peak current recovery rate in the absence of  $K_{in}^+$  and  $Na_{in}^+$ , at - 50 mV, 0 mV and + 20 mV: the recovery rate remained voltage-dependent, but the voltage-dependence was less pronounced than in the presence of physiological ion gradients (*cf.* Fig. 5E and 5D). The shift in voltage-dependence was not due to the absence of  $K_{in}^+$  but rather due to the presence of 6 mM  $Na_{in}^+$  in the experimental conditions of Fig. 5D. We confirmed this conclusion by measuring the voltage dependence with 160 mM  $K_{in}^+$  and 0 mM  $Na_{in}^+$  (*cf.* Fig. 5E and 5F). This observation also supports the conclusion that the faster return at positive potentials is due to transporters operating in the exchange mode; see-sawing through the exchange mode requires  $Na_{in}^+$  (*Khoshbouei et al., 2003; Kahlig et al., 2005; Hasenhuettl et al., 2016*).

### The uptake rate of $APP^+$ and dopamine is unaffected by $Cl_{in}^-$ .

In Fig.5G we assessed the effect of intracellular  $Cl^-$  on uptake of  $APP^+$  (10  $\mu$ M) through DAT at - 60 mV. Shown are the slopes of the  $APP^+$  induced rise in fluorescence at 0.5 mM ( $n = 7$ ) and 142 mM  $Cl_{in}^-$  ( $n = 8$ ), respectively. The slopes were not different ( $p = 0.93$ ; Mann Whitney test) suggesting that  $Cl_{in}^-$  plays no role in the rate of  $APP^+$  uptake. In a recent study, Erreger and coworkers (*Erreger et al., 2008*) measured the time course of peak recovery at 2 mM and at 140 mM  $Cl_{in}^-$  and found the cycle rate reduced by a factor of about three at low  $Cl_{in}^-$ , when d-amphetamine was used as the substrate. If true, this implies that substrates differ in their dependence on  $Cl_{in}^-$ . In fact, when we measured the peak current recovery at 0.5 mM and 142 mM  $Cl_{in}^-$ , respectively using dopamine as the substrate we did not observe a change in recovery rate (Fig. 5H). The data points in the graph are the normalized peak current amplitudes induced by 30  $\mu$ M dopamine as a function of the time interval between the reference and the test pulse. The recordings were conducted at - 50 mV. The rates estimated by fits of a mono-exponential function to the data were 2.5  $s^{-1}$  (0.5 mM  $Cl_{in}^-$  ( $n = 6$ ); open circles, blue solid line) and 3.0  $s^{-1}$  (142 mM  $Cl_{in}^-$  ( $n = 6$ ); open squares, black solid line). Difference in these rates was not statistically significant ( $p = 0.086$ , F-test). Hence, our results show that the uptake rate of  $APP^+$  and of dopamine are independent of  $Cl_{in}^-$  at concentrations ranging from 0.5 mM to 142 mM. We note, however, that for technical reasons we could not test  $Cl_{in}^-$  concentrations below 0.5 mM.



## A kinetic model for the transport cycle of DAT.

DAT and SERT share many functional properties; a non-exhaustive list of common features includes: (i) their inward-facing conformations bind  $\text{Na}^+$  in a voltage-dependent manner (this study and *Hasenhuetl et al., 2016*); (ii) they both handle  $\text{Cl}^-$  similarly (this study and *Hasenhuetl et al., 2016*); (iii) the return of the transporter from the substrate-free inward- to the substrate-free outward-facing conformation is the rate-limiting step for substrate turnover by both transporters (*Erreger et al., 2008; Schicker et al., 2012*). Strikingly, however, our current observations show that all major differences between SERT and DAT can be accounted for by the difference in handling of  $\text{K}_{\text{in}}^+$ , e.g.: (i)  $\text{K}_{\text{in}}^+$  fails to render the peak current recovery by DAT voltage-independent; (ii)  $\text{K}_{\text{in}}^+$  has a very modest effect on the steady current amplitude and (iii) does not affect the rate of substrate transport in DAT. In all three instances,  $\text{K}_{\text{in}}^+$  has the opposite effect on SERT (*Hasenhuetl et al., 2016*). Our current observations showed, though, that  $\text{K}_{\text{in}}^+$  bound to DAT in a voltage-dependent manner. Thus, electrogenic binding of  $\text{K}^+$  is another common feature in SERT and DAT. It is, however, enigmatic why  $\text{K}_{\text{in}}^+$  binding to both transporters affects the function of these transporters so differently. We hypothesized that the differences between SERT and DAT can all be explained by positing that, in the return step from the substrate-free inward- to the substrate-free outward-facing conformation,  $\text{K}_{\text{in}}^+$  is counter-transported by SERT, but left inside by DAT. We tested the plausibility of this conjecture by resorting to kinetic modelling. As a starting point, we used the previously proposed kinetic model of DAT by *Erreger et al., 2008*. The salient features of this model were: (i) only one  $\text{Na}^+$  ion is co-transported with the substrate, (ii) the return from the substrate free inward- to the substrate-free outward-facing conformation (the return step) is not contingent on prior  $\text{Cl}^-$  dissociation and (iii) the return step is rate limiting for substrate transport. The refined model in Fig. 6A conforms to all of the above. This is evidenced by the fact that the original scheme (shaded in grey) is nested within our proposed model. The notion that only one  $\text{Na}^+$  is co-transported with the substrate is widely accepted for SERT (*Rudnick, 1977*). For DAT, it has been proposed that two  $\text{Na}^+$  ions are co-transported (*Krueger, 1990; McElvain and Schenk, 1992*). However, we adhered to the stoichiometry posited by *Erreger et al.* because our experimental results support the idea that only one  $\text{Na}^+$  ion is co-transported in each cycle (see Fig. 3F). Our data show that  $\text{Na}^+$  binding to the inward facing conformation of DAT is a voltage-dependent process. We incorporated this into the model by assigning a valence of 1 to this reaction.

The refined model takes into account the action of  $\text{K}_{\text{in}}^+$  on DAT, which was not explored earlier (*Erreger et al., 2008*). We assigned a valence of 1 to the reaction of  $\text{K}_{\text{in}}^+$  binding to the inward facing conformation of DAT. This assured that the inwardly directed current, produced by outgoing  $\text{Na}_{\text{in}}^+$  ions dissociating into the cytosol, was canceled out by the outwardly directed current generated by the incoming  $\text{K}_{\text{in}}^+$  ions. This point is illustrated in Fig. 6B, where we show the simulated current component produced by dissociating  $\text{Na}_{\text{in}}^+$  ions (upper panel) and associating  $\text{K}_{\text{in}}^+$  ions (middle panel) individually for voltages ranging from -60 mV to +30 mV. When summed, these currents canceled each other out (see lower panel). In the refined model, we accounted for the uncoupled current component observed in the presence of  $\text{K}_{\text{in}}^+$  by adding a conducting state, which is in equilibrium with the  $\text{K}_{\text{in}}^+$ -bound inward-facing conformation (indicated in blue). This is akin to how we previously modeled the uncoupled current through SERT. In contrast to SERT, where compelling evidence exists that  $\text{K}^+$  is antiported, we assumed that  $\text{K}^+$  is shed off by DAT in the return step from  $T_i$  to  $T_o$ , i.e. the substrate-free inward- to the substrate-free outward-facing conformation. It was necessary to subdivide this transition into three consecutive reactions to incorporate this concept into the kinetic model: in the first reaction (when viewed in the clockwise direction), DAT adopts an

inward-facing conformation on the trajectory to the occluded state, to which  $K_{in}^+$  can still bind, but with reduced affinity. In the second reaction, DAT fully occludes after shedding off  $K_{in}^+$ . Following occlusion, the transporter can then rearrange and adopt the outward-facing conformation. In Fig. 6C, we show synthetic traces of dopamine-induced currents in the assumed presence (upper panel) and absence (lower panel) of  $K_{in}^+$  at -60 mV, as predicted by the model. The amplitude of the steady current in the simulation was larger with  $K_{in}^+$  present. The upper panel of Fig. 6D displays the calculated voltage-dependence of the steady current with and without  $K_{in}^+$ : the synthetic data are in reasonable agreement with the data shown in Fig. 4B. The lower panel of Fig. 6D shows the simulated open probability ( $P_o$ ) of the conducting state as a function of voltage. It is obvious from this plot that the conducting state is gated by voltage. This property can be readily explained:  $T_{iCond}$  is assumed to be in equilibrium with  $T_{iClk}$ . Occupancy of  $T_{iClk}$  is increased at positive potentials, due to the voltage dependent slowing of the substrate-free return step. This may explain the parallel shift in the two current-voltage relations, i.e.  $P_o$  is lower at negative potential but the driving force for  $Na^+$  is larger; the opposite situation is seen at positive potentials.

Our kinetic model of DAT was also able to faithfully predict cellular uptake of  $APP^+$ . In the model, we accounted for the larger  $K_M$  value observed with  $APP^+$  by assuming a 10-fold lower association rate for  $APP^+$  than for dopamine. It is worth pointing out that a lower association rate can also explain why we failed to see an  $APP^+$ -induced peak current at concentrations below 30  $\mu M$  (Fig. 2B). In Fig. 6E, we simulated uptake of  $APP^+$  in the presence and absence of  $K_{in}^+$  for voltages between -60 mV and +30 mV: it is evident that uptake of  $APP^+$  and the voltage dependence thereof was only affected to very less extent by the absence of intracellular  $K^+$ .

Our modeling exercise demonstrates that DAT can bind  $K_{in}^+$  but does not antiport it, i.e. it is possible to implement this concept into a kinetic model without violating microscopic reversibility. More importantly, we show that the assumed inability of DAT to countertransport  $K_{in}^+$  can explain (i) the presence of a coupled current component and (ii) the lack of effect of  $K_{in}^+$  on the voltage-dependence of substrate transport. We stress that these two observations would have been difficult to explain, if  $K^+$  was antiported by DAT.

## Discussion

Mechanistic and functional insights into the mode of operation of monoamine transporters have been derived either by relying on radioligands, which bind to monoamine transporters and are substrates or inhibitors, or by electrophysiological recordings of transport-associated ion fluxes. Radioligand-based techniques, used to assess global transporter-mediated uptake or release, lack membrane voltage control, temporal resolution and sampling frequencies to resolve individual partial reactions that constitute a transport cycle. These issues can be addressed by single cell electrophysiological recordings. These measurements, however, rely on transporter-mediated currents as an indirect surrogate for substrate uptake and are often confounded by additional conductance not directly related to substrate transport (i.e. uncoupled currents). Fluorescent substrates of monoamine transporters, on the other hand, help circumvent limitations imposed by radioligand assays or electrophysiological recordings by monitoring transporter-mediated uptake in real time (Schwartz *et al.*, 2003; Mason *et al.*, 2005; Schwartz *et al.*, 2005; Solis Jr. *et al.*, 2012; Karpowicz Jr *et al.*, 2013; Wilson *et al.*, 2014; Zwartsen *et al.*, 2017). In this study, we investigated the transport cycle of DAT, in single DAT-expressing HEK293 cells, by employing simultaneous measurements of substrate-induced currents recorded in the whole-cell patch-clamp configuration and cellular uptake of the fluorescent substrate  $APP^+$ . The key finding of our study is that the voltage-

dependence of DAT-mediated substrate uptake and ionic currents is dictated by intracellular binding of  $K_{in}^+$  to DAT. This conclusion is based on the following observations: (i) both, uptake of  $APP^+$  and substrate-induced currents decreased at positive voltages in DAT-expressing cells. (ii) Replacing  $K_{in}^+$  with the inert cation NMDG<sup>+</sup> did not influence the rate of substrate uptake but led to reduction in amplitudes of substrate-induced DAT steady-state currents. (iii) The current-voltage relationship of peak currents was identical when patched with internal solutions, which contained either high  $K_{in}^+$  or  $Na_{in}^+$  concentrations, indicating mutually exclusive binding of the two ions on the same site (presumably  $Na_2$ ). This relationship was steeper when  $Na_{in}^+$  or  $K_{in}^+$  were replaced intracellularly by either NMDG<sup>+</sup> or Li<sup>+</sup>. (iv) A kinetic model can simulate  $K_{in}^+$  binding to DAT as transient and reversible, without requiring antiport of  $K_{in}^+$  when the transporter isomerizes from  $T_i$  to  $T_o$ , the empty inward open to the outward open apo-state. This model accounts for all experimental observations, which support the conclusion that the transient  $K_{in}^+$  binding to DAT is electrogenic, tempers the electrogenic dissociation of  $Na_{in}^+$  from DAT to a certain extent (but not completely) and gives rise to uncoupled currents (that is, currents unrelated to the DAT transport cycle).

Conclusions made from earlier studies assessing voltage dependence of DAT mediated uptake were conflicting (*Hoffman et al., 1999; Prasad and Amara, 2001*). We addressed these discrepancies by studying DAT mediated uptake of  $APP^+$ .  $APP^+$  is a fluorescent analog of the neurotoxin MPP<sup>+</sup>, a known substrate for all 3 monoamine transporters (*Scholze et al., 2002*).  $APP^+$  fluoresces in non-polar environments but is quenched in aqueous solutions (*Karpowicz Jr et al., 2013*). Upon transporter-mediated entry into cells,  $APP^+$  binds to membranes of organelles (mostly mitochondria) due to the permanent positive charge on  $APP^+$ . This leads to  $APP^+$  sequestration in cells expressing monoamine transporters and low levels of cytosolic  $APP^+$ . Therefore, cellular  $APP^+$  uptake (but not release) can be directly monitored in real time by recording the rise of fluorescence resulting from intracellular sequestration. We obtained recordings of the time course by which  $APP^+$  accumulated in cells expressing DAT. The cells were measured in the whole-cell patch-clamp configuration, which allowed us to directly assess the effect of voltage on this process. We were able to demonstrate that  $APP^+$  uptake by DAT is voltage-dependent, with reduced uptake at increasingly positive voltages. To ensure that the conclusions obtained from our recordings of  $APP^+$  uptake also hold true for uptake of dopamine (which does not fluoresce), we analyzed currents induced by  $APP^+$ . As shown by us and others (*Solis Jr. et al., 2012*),  $APP^+$ -induced currents showed the hallmark features of those induced by other DAT substrates such as dopamine or D-amphetamine (*Erreger et al., 2008*), an inwardly directed peak current and a steady current component. Finally, the  $K_M$  values for  $APP^+$  were identical, when determined by the substrate-induced currents and by examining the concentration-dependent slope of the  $APP^+$ -induced rise in fluorescence.

Another aspect to our study was to understand why the structurally similar SERT and DAT differ so much in transport kinetics and handling of co-substrate binding manifested as ionic stoichiometry. In a previous study, we explored the transport cycle of SERT in great detail to generate a comprehensive model of the transport cycle of SERT (*Hasenhuetl et al., 2016*). It is evident that DAT resembles SERT in most aspects. We show here that all major differences can be accounted for by the distinct handling of  $K_{in}^+$ : in SERT, physiological  $K_{in}^+$  concentrations accelerate the rate of substrate uptake (i.e. peak current recovery rate) such that it is 2-fold faster than in the absence  $K_{in}^+$ . In DAT,  $K_{in}^+$  did not influence rate of substrate uptake. In addition, in the presence of physiological  $K_{in}^+$  concentrations, the cycle completion rate of SERT is independent of voltage. This was not the case in DAT. In both transporters, release of  $Na^+$  from the inward facing conformation is electrogenic. In SERT, this electrogenic  $Na_{in}^+$  dissociation is canceled out by electrogenic  $K_{in}^+$  binding to the inward-open empty transporter, thereby rendering the cycle completion

rate voltage-independent. In DAT, however, the cycle completion rate remained voltage-dependent despite the fact that  $K_{in}^+$  also bound in a voltage-dependent manner.  $K_{in}^+$  is also relevant to account for the distinct nature of the steady-state current component in SERT and DAT. The steady current component carried by the electroneutral SERT is produced by an uncoupled  $Na^+$  flux through a channel state that is in equilibrium with the  $K_{in}^+$ -bound inward-facing conformation (Schicker *et al.*, 2012). Replacing  $K_{in}^+$  with NMDG<sup>+</sup> completely abrogates SERT mediated steady-state currents. DAT-mediated transport is accompanied by the translocation of coupled net positive charges in each cycle. Thus, DAT-mediated steady-state currents were originally modeled to be strictly coupled to substrate transport (Erreger *et al.*, 2008). However, our data suggests that DAT also carries an uncoupled current component, which adds up to coupled currents associated with DAT-mediated ionic transport. This uncoupled current in DAT, just like in SERT, is contingent on the presence of intracellular  $K_{in}^+$ . Binding of  $K_{in}^+$  to DAT at the  $Na_2$  site was proposed earlier by a study that employed extensive molecular dynamic simulations to understand  $Na^+$  dissociation intracellularly by DAT (Razavi *et al.*, 2017). Our results, which showcase similarities in voltage dependencies of peak amplitudes in the presence of either high  $Na_{in}^+$  or high  $K_{in}^+$  (Fig. 5C), are in agreement of this hypothesis.

The most parsimonious explanation for all differences between SERT and DAT was to posit that  $K^+$  is antiported by SERT but not by DAT. Accordingly, our analyses provide a unifying concept of substrate transport through SERT and DAT, i.e., SERT and DAT are equivalent in all aspects of their transport cycle but one: in SERT the binding site for  $K_{in}^+$  remains intact upon conversion of the transporter from the inward to the outward facing conformation. In contrast, this binding site is less stable in DAT. The resulting loss in affinity leads to the shedding of  $K_{in}^+$  prior to the return step. The repercussions of this subtle difference are profound: SERT and DAT differ (i) in their voltage-dependence of substrate uptake, (ii) in the nature of the substrate-induced current and (iii) in the energy sources exploited for concentrative substrate transport. If DAT does not antiport  $K_{in}^+$ , its concentrative power must be independent of the existing  $K^+$  gradient. On the other hand, if the stoichiometry of DAT is electrogenic, a change in membrane voltage is predicted to increase or decrease substrate uptake at steady state depending on the direction of the voltage change. In this context, it is important to note that the experiments conducted in the present study all report on substrate transport at pre-steady state. Additional insights on whether or not DAT can antiport  $K_{in}^+$  can come from experiments conducted at the thermodynamic equilibrium. Such experiments need to be performed by, for instance, employing a vesicular membrane preparation that contains reconstituted DAT. Such preparations allow for the control of the inner and outer ion composition and membrane voltage while preventing the substrate to escape from the vesicular confinement. However steady-state assessment of transporter mediated substrate uptake is hindered by the fact that DAT and SERT can also transport substrate in the absence of  $K_{in}^+$ . These observations are difficult to reconcile with the concept of transport by fixed stoichiometry. We, therefore, surmise that SERT and DAT, operate with a mixed stoichiometry. Based on our data we conclude that DAT is less likely than SERT to antiport  $K^+$ , because we cannot rule out that DAT can occasionally carry the  $K^+$  ion through the membrane. Conversely SERT antiports  $K^+$  in the majority of its cycles but may return empty in some instances. We thus believe that the differences between these two transporters in regard to their handling of  $K_{in}^+$  represents a continuum, as opposed to divergence, in ionic coupling and kinetic decision points during substrate transport. The difference between SERT and DAT represent different solutions to an inherent trade-off and may reflect an adaptation to physiological requirements: because of electrogenic binding and subsequent counter-transport of  $K^+$ , SERT operates in the forward transport mode with a constant rate regardless of membrane potential, but it cannot exploit the membrane potential to fuel its concentrative

power. In contrast, DAT can harvest the energy of the transmembrane potential to fuel its concentrative power. As a trade-off, the substrate uptake rate DAT is voltage-dependent and strongly reduced upon membrane depolarization.

#### Acknowledgments

We thank Verena Burtscher for discussion and comments on the data. This work was supported by the Austrian Science Fund (FWF) grant P 31599 and P 31813 to W.S , W1232 to H.H.S and the Vienna Science and Technology Fund (wwtf) grant CS15-033 to H.H.S and LS17-026 to M.F.

#### References

- Adams SV**, DeFelice LJ. 2003. Ionic currents in the human serotonin transporter reveal inconsistencies in the alternating access hypothesis. *Biophysical Journal* **85**:1548-59. doi: 10.1016/S0006-3495(03)74587-1, PMID: 12944272
- Burtscher V**, Schicker K, Freissmuth M, Sandtner W. 2019. Kinetic Models of Secondary Active Transporters. *International Journal of Molecular Sciences* **20**:5365. doi: 10.3390/ijms20215365, PMID: 31661895
- Carvelli L**, McDonald PW, Blakely RD, DeFelice LJ. 2004. Dopamine transporters depolarize neurons by a channel mechanism. *Proceedings of the National Academy of Sciences of the United States of America* **101**:16046-51. doi: 10.1073/pnas.0403299101, PMID: 15520385
- Coleman JA**, Green EM, Gouaux E. 2016. X-ray structures and mechanism of the human serotonin transporter. *Nature* **532**:334–339. DOI: <https://doi.org/10.1038/nature17629>, PMID: 27049939
- Erreger K**, Grewer C, Javitch JA, Galli A. 2008. Currents in response to rapid concentration jumps of amphetamine uncover novel aspects of human dopamine transporter function. *The Journal of Neuroscience* **28**:976-89. doi: 10.1523/JNEUROSCI.2796-07.2008, PMID: 18216205
- Hasenhuettl PS**, Schicker K, Koenig X, Li Y, Sarker S, Stockner T, Sucic S, Sitte HH, Freissmuth M, Sandtner W. 2015. Ligand Selectivity among the Dopamine and Serotonin Transporters Specified by the Forward Binding Reaction. *Molecular Pharmacology* **88**:12-8. doi: 10.1124/mol.115.099036, PMID: 25873594
- Hasenhuettl PS**, Freissmuth M, Sandtner W. 2016. Electrogenic binding of intracellular cations defines a kinetic decision point in the transport cycle of the human serotonin Transporter. *The Journal of Biological Chemistry* **291**: 25864–25876. DOI: <https://doi.org/10.1074/jbc.M116.753319>, PMID: 27756841
- Hasenhuettl PS**, Bhat S, Freissmuth M, Sandtner W. 2019. Functional Selectivity and Partial Efficacy at the Monoamine Transporters: A Unified Model of Allosteric Modulation and Amphetamine-Induced Substrate Release. *Molecular Pharmacology* **95**:303-312. doi: 10.1124/mol.118.114793, PMID: 30567955
- Hoffman AF**, Zahniser NR, Lupica CR, Gerhardt GA. 1999. Voltage-dependency of the Dopamine Transporter in the Rat Substantia Nigra. *Neuroscience Letters* **260**:105-8. doi: 10.1016/s0304-3940(98)00951-3, PMID: 10025710
- Jardetzky O**. 1966. Simple Allosteric Model for Membrane Pumps. *Nature* **211**:969-70. doi: 10.1038/211969a0, PMID: 5968307

**Kahlig KM**, Binda F, Khoshbouei H, Blakely RD, McMahon DG, Javitch JA, Galli A. 2005. Amphetamine induces dopamine efflux through a dopamine transporter channel. *Proceedings of the National Academy of Sciences of the United States of America* **102**:3495-500. doi: 10.1073/pnas.0407737102, PMID: 15728379

**Karpowicz Jr RJ**, Dunn M, Sulzer D, Sames D. 2013. APP<sup>+</sup>, a Fluorescent Analogue of the Neurotoxin MPP<sup>+</sup>, Is a Marker of Catecholamine Neurons in Brain Tissue, but Not a Fluorescent False Neurotransmitter. *ACS Chemical Neuroscience* **4**:858-69. doi: 10.1021/cn400038u, PMID: 23647019

**Khoshbouei H**, Wang H, Lechleiter JD, Javitch JA, Galli A. 2003. Amphetamine-induced dopamine efflux. A voltage-sensitive and intracellular Na<sup>+</sup>-dependent mechanism. *The Journal of Biological Chemistry* **278**:12070-7. doi: 10.1074/jbc.M212815200, PMID: 12556446

**Krueger BK**. 1990. Kinetics and Block of Dopamine Uptake in Synaptosomes From Rat Caudate Nucleus. *Journal of Neurochemistry* **55**:260-7. doi: 10.1111/j.1471-4159.1990.tb08847.x, PMID: 2355221

**Kristensen AS**, Andersen J, Jørgensen TN, Sørensen L, Eriksen J, Loland CJ, Strømgaard K, Gether U. 2011. SLC6 Neurotransmitter Transporters: Structure, Function, and Regulation. *Pharmacological Reviews* **63**:585-640. doi: 10.1124/pr.108.000869, PMID: 21752877

**Läuger, P**. 1991. *Electrogenic Ion Pumps*. Sinauer Associates, Sunderland, MA. 313 pp.

**Li Y**, Hasenhuetl PS, Schicker K, Sitte HH, Freissmuth M, Sandtner W. 2015. Dual Action of Zn<sup>2+</sup> on the Transport Cycle of the Dopamine Transporter. *The Journal of Biological Chemistry* **290**:31069-76. doi: 10.1074/jbc.M115.688275, PMID: 26504078

**Mason JN**, Farmer H, Tomlinson ID, Schwartz JW, Savchenko V, DeFelice LJ, Rosenthal SJ, Blakely RD. 2005. Novel fluorescence-based approaches for the study of biogenic amine transporter localization, activity, and regulation. *Journal of Neuroscience Methods* **143**:3-25. doi: 10.1016/j.jneumeth.2004.09.028, PMID: 15763132

**McElvain JS**, Schenk JO. 1992. A Multisubstrate Mechanism of Striatal Dopamine Uptake and Its Inhibition by Cocaine. *Biochemical Pharmacology* **43**:2189-99. doi: 10.1016/0006-2952(92)90178-I, PMID: 1599505

**Niello M**, Gradisch R, Loland CJ, Stockner T, Sitte HH. 2020. Allosteric Modulation of Neurotransmitter Transporters as a Therapeutic Strategy. *Trends in Pharmacological Sciences* **41**:446-463. doi: 10.1016/j.tips.2020.04.006, PMID: 32471654

**Penmatsa A**, Wang KH, Gouaux E. 2013. X-ray structure of dopamine transporter elucidates antidepressant mechanism. *Nature* **503**:85-90. doi: 10.1038/nature12533, PMID: 24037379

**Prasad BM**, Amara SG. 2001. The Dopamine Transporter in Mesencephalic Cultures Is Refractory to Physiological Changes in Membrane Voltage. *The Journal of Neuroscience* **21**:7561-7. doi: 10.1523/JNEUROSCI.21-19-07561.2001, PMID: 11567046

**Razavi AM**, Khelashvili G, Weinstein H. 2017. A Markov State-based Quantitative Kinetic Model of Sodium Release From the Dopamine Transporter. *Scientific Reports* **7**:40076. doi: 10.1038/srep40076, PMID: 28059145

**Rudnick G.** 1977. Active transport of 5-hydroxytryptamine by plasma membrane vesicles isolated from human blood platelets. *The Journal of Biological Chemistry* **252**:2170-4. PMID: 849926

**Rudnick G,** Nelson PJ. 1978. Platelet 5-hydroxytryptamine transport, an electroneutral mechanism coupled to potassium. *Biochemistry* **17**:4739-42. doi: 10.1021/bi00615a021, PMID: 728383

**Rudnick G,** Sandtner W. 2019. Serotonin Transport in the 21st Century. *The Journal of General Physiology* **151**:1248-1264. doi: 10.1085/jgp.201812066, PMID: 31570504

**Schicker K,** Uzelac Z, Gesmonde J, Bulling S, Stockner T, Freissmuth M, Boehm S, Rudnick G, Sitte HH, Sandtner W. 2012. Unifying concept of serotonin transporter-associated currents. *The Journal of Biological Chemistry* **287**:438-45. doi: 10.1074/jbc.M111.304261, PMID: 22072712

**Schmidt H,** Jirstrand M. 2006. Systems Biology Toolbox for MATLAB: a computational platform for research in systems biology. *Bioinformatics* **22**:514–515. doi: 10.1093/bioinformatics/bti799, PMID: 16317076

**Scholze P,** Nørregaard L, Singer EA, Freissmuth M, Gether U, Sitte HH. 2002. The Role of Zinc Ions in Reverse Transport Mediated by Monoamine Transporters. *The Journal of Biological Chemistry* **277**:21505-13. doi: 10.1074/jbc.M112265200, PMID: 11940571

**Schwartz JW,** Blakely RD, DeFelice LJ. 2003. Binding and transport in norepinephrine transporters. Real-time, spatially resolved analysis in single cells using a fluorescent substrate. *The Journal of Biological Chemistry* **278**:9768-77. doi: 10.1074/jbc.M209824200, PMID: 12499385

**Schwartz JW,** Novarino G, Piston DW, DeFelice LJ. 2005. Substrate binding stoichiometry and kinetics of the norepinephrine transporter. *The Journal of Biological Chemistry* **280**:19177-84. doi: 10.1074/jbc.M412923200, PMID: 15757904

**Sitte HH,** Huck S, Reither h, Boehm S, Singer EA, Pifl C. 1998. Carrier-mediated release, transport rates, and charge transfer induced by amphetamine, tyramine, and dopamine in mammalian cells transfected with the human dopamine transporter. *Journal of Neurochemistry* **71**:1289-1297. doi: 10.1046/j.1471-4159.1998.71031289.x, PMID: 9721755

**Solis E Jr,** Zdravkovic I, Tomlinson ID, Noskov SY, Rosenthal SJ, De Felice LJ. 2012. 4-(4-(dimethylamino)phenyl)-1-methylpyridinium (APP+) is a fluorescent substrate for the human serotonin transporter. *The Journal of Biological Chemistry* **287**:8852-63. doi: 10.1074/jbc.M111.267757, PMID: 22291010

**Sonders MS,** Zhu SJ, Zahniser NR, Kavanaugh MP, Amara SG. 1997. Multiple ionic conductances of the human dopamine transporter: the actions of dopamine and psychostimulants. *The Journal of Neuroscience* **17**:960-74. doi: 10.1523/JNEUROSCI.17-03-00960.1997, PMID: 8994051

**Wilson JN,** Ladefoged LK, Babinchak WM, Schiøtt B. 2014. Binding-induced fluorescence of serotonin transporter ligands: A spectroscopic and structural study of 4-(4-(dimethylamino)phenyl)-1-methylpyridinium (APP(+)) and APP(+) analogues. *ACS Chemical Neuroscience* **5**:296-304. doi: 10.1021/cn400230x, PMID: 24460204

**Yamashita A**, Singh SK, Kawate T, Jin Y, Gouaux E. 2005. Crystal structure of a bacterial homologue of Na<sup>+</sup>/Cl<sup>-</sup>-dependent neurotransmitter transporters. *Nature* **437**:215–223. doi: 10.1038/nature03978, PMID: 16041361

**Zwartsen A**, Verboven AHA, van Kleef RGDM, Wijnolts FMJ, Westerink RHS, Hondebrink L. 2017. Measuring inhibition of monoamine reuptake transporters by new psychoactive substances (NPS) in real-time using a high-throughput, fluorescence-based assay. *Toxicology In Vitro* **45**:60-71. doi: 10.1016/j.tiv.2017.05.010, PMID: 28506818

### Figure legends:

**Fig. 1.** Single cell uptake of APP<sup>+</sup>. **A & B.** Representative traces of APP<sup>+</sup> fluorescence emission recorded from a cell expressing DAT (A) and a control cell (B) Cells were held at - 60 mV in the whole-cell patch-clamp configuration. The extra- and intracellular solution contained physiological ion concentrations. APP<sup>+</sup> was applied for a period 5 seconds at the indicated concentrations. The dashed black lines in panel A are the linear regression to the continuous rise in APP<sup>+</sup> fluorescence, which is absent in panel B. The fast initial rise seen in A. and B. reflects reversible APP<sup>+</sup> binding to the plasma membrane. **C.** The slopes obtained from the linear regression (as shown in panel A) were normalized to the slope recorded at 600 μM APP<sup>+</sup> to account for inter-cell variation and plotted as function of APP<sup>+</sup> concentration (n = 8). The solid black line indicates a fit of the Michaelis Menten equation to the data points (open circles; error bars are SD). The K<sub>M</sub> was 27.7 μM (95% confidence interval: 20.6 - 34.9 μM). **D.** Representative traces showing APP<sup>+</sup> uptake recorded from an DAT expressing cell at - 60 mV, - 30 mV and 0 mV, respectively. The cell was exposed to 10 μM APP<sup>+</sup> for a period of 15 seconds. **E.** Normalized slopes at 10 μM APP<sup>+</sup> as a function of voltage (range: - 90 mV to + 40 mV). The rate of fluorescence increase was normalized (- 90 mV = 1) to account for inter-cell variation. The solid black line was drawn by fitting the data points to the Boltzmann equation (n = 12). The estimated valence and V<sub>50</sub> were 1.3 (95% confidence interval: 0.9 - 2.2) and - 28.5mV (95% confidence interval: - 35 to - 21.9 mV), respectively.

**Fig. 2.** APP<sup>+</sup> induced currents through DAT. **A.** Representative trace of a dopamine-induced current through DAT. The cell was clamped to - 60 mV and 30 μM dopamine was applied for a period of 5 seconds. The current features a peak and a steady component. **B.** Representative traces of currents elicited by 10 μM, 30 μM, 100 μM and 300 μM APP<sup>+</sup>. At concentrations higher than 10 μM the currents displayed a peak and a steady component. **C.** Normalized steady current amplitude as a function of APP<sup>+</sup> concentration (open circles, n = 6; error bars are SD). The current amplitude recorded at 600 μM APP<sup>+</sup> was set 1.0 to normalize for inter-cell variation. The solid blue line was drawn by fitting the data points to the Michaelis-Menten equation. The K<sub>M</sub> was 21.5 μM (95% confidence interval: 13 - 30 μM). The dashed black line is the fit through the data in Fig. 1C (i.e. the slopes of APP<sup>+</sup> fluorescence). **D.** Voltage dependence of the normalized steady current amplitude (multiplied by - 1) evoked by 600 μM APP<sup>+</sup> (open circles; n = 6; error bars are SD). The solid black line is the fit of the Boltzmann equation to the data points (valence: 1.3; 95% confidence interval: 0.72 - 2.4; V<sub>50</sub>: - 39.3 mV; 95% confidence interval: - 53.9 - to 24.7 mV). The dashed line is the sign-inverted fit to the data shown in Fig. 1E (i.e. the slopes of APP<sup>+</sup> fluorescence).



**Fig. 3.** Na<sup>+</sup> binding to the inward-facing conformation of DAT is voltage-dependent. **A.** Representative recordings of APP<sup>+</sup> uptake into a cell expressing DAT. The intracellular solution in this experiment contained 160 mM Na<sup>+</sup>. The cell was repeatedly exposed to 10 μM APP<sup>+</sup> for 15 seconds. The displayed traces were recorded at - 90 mV, - 60 mV, - 30 mV, 0 mV and + 30 mV, respectively. **B.** Normalized slopes of the APP<sup>+</sup> induced rise in fluorescence plotted as a function of voltage (open circles; n = 9; error bars are SD). The solid black line is the line fit of the data points to the Boltzmann equation. **C.** Comparison of the slopes of APP<sup>+</sup> fluorescence in 9 cells each measured at 6 mM Na<sub>in</sub><sup>+</sup> and at 160 mM Na<sub>in</sub><sup>+</sup>. The two groups of cells were compared at - 90 mV and - 30 mV. Open circles (160 mM Na<sub>in</sub><sup>+</sup>, - 90 mV), open squares (6 mM Na<sub>in</sub><sup>+</sup>, - 90 mV), open triangles (160 mM Na<sub>in</sub><sup>+</sup>, - 30 mV) and open diamonds (6 mM Na<sub>in</sub><sup>+</sup>, - 30 mV). The high intracellular Na<sup>+</sup> concentration was inhibitory at both potentials (p < 0.0001); Mann Whitney test. **D.** Representative traces of currents elicited by dopamine (30 μM) recorded at potentials between - 60 mV and + 10 mV. Shown are the first 200 ms of the recording at the indicated potentials. In the experiment Na<sub>in</sub><sup>+</sup> and K<sub>in</sub><sup>+</sup> were replaced by the inert cation NMDG<sup>+</sup>. Under these conditions, the current featured a peak and a steady component. **E.** Representative traces obtained as in panel D but with 160 mM Na<sub>in</sub><sup>+</sup>. Under these conditions, the peak current was present but the steady current component was suppressed. **F.** Normalized peak current amplitudes (multiplied by - 1) as a function of voltage. Plotted in the same graph are the data for zero Na<sub>in</sub><sup>+</sup>/ K<sub>in</sub><sup>+</sup> (open circles; n = 6) and for 160 mM Na<sub>in</sub><sup>+</sup> (open squares; n = 6), respectively. The solid blue and black lines were drawn by fitting the data to the Boltzmann equation. In the absence of intracellular Na<sup>+</sup> and K<sup>+</sup> the estimated valence was 1.22 (95% confidence interval: 0.73 - 3.65) and V<sub>50</sub> = - 24.5 mV (95% confidence interval: -36.5 - -12.5 mV). In the presence of 160 mM Na<sub>in</sub><sup>+</sup>, the valence was 0.39 (95% confidence interval: 0.13 - 2). We obtained the latter estimate by imposing the following constraints onto the fit: (i) top value < zero, (ii) shared V<sub>50</sub> between data sets.

**Fig. 4.** Effects of intracellular K<sup>+</sup> on dopamine-induced currents and APP<sup>+</sup> uptake through DAT. **A.** representative trace of a current recorded from a cell expressing DAT, which was held at - 60 mV. The current was evoked by a 5 second application of 30 μM dopamine. The intracellular solution was devoid of K<sup>+</sup>. **B.** Comparison of the steady current amplitudes in the absence (open circles) and presence of K<sub>in</sub><sup>+</sup> (open squares) (n = 9 each). The currents were recorded in a voltage range from - 90 mV to + 30 mV. The solid blue and black line were drawn by fitting the data points to the Boltzmann equation. K<sub>in</sub><sup>+</sup> (0 mM): valence = 1.03 (95% confidence interval: 0.46 - 4.8]; K<sub>in</sub><sup>+</sup> (160 mM): valence = 1.02 (95% confidence interval: 0.40 - 1.9). The inset shows the comparison of amplitudes recorded at - 20 mV. The difference in amplitude at this potential was significant (p = 0.003, Mann-Whitney test). The error bars in the graph are SEM, but SD in the inset. **C.** The traces are an example of a two-pulse protocol, which is schematically outlined above the traces: all currents were evoked by the application of 30 μM dopamine. The reference pulse (first red bar giving rise to the first current) was followed by a test pulse (second red bar giving rise to the second current). The time intervals (indicated by the gap) between the two pulses were 0.1 s, 0.2 s, 0.4 s, 0.6 s, 0.8 s, 1.2 s and 2 s. **D.** Normalized peak currents as a function of the time interval between reference and test pulse for 0 mM K<sub>in</sub><sup>+</sup> (open circles; n = 6; error bars are SD) and 160 mM K<sub>in</sub><sup>+</sup> (open squares; n = 6; error bars are SD). The currents were recorded at - 50 mV. The solid blue and black lines were drawn by fitting the data points to mono-exponential rises. Tau (0 mM K<sub>in</sub><sup>+</sup>) = 0.22 s (95% confidence interval: 0.16-0.40 s); Tau (160 mM K<sub>in</sub><sup>+</sup>) = 0.26 s (95% confidence interval: 0.19 - 0.46 s). The two time courses were not different (p=0.86; F-test). **E.** Representative traces of recordings of APP<sup>+</sup> uptake (0 mM K<sup>+</sup> upper panel; 160 mM K<sup>+</sup> lower panel) from two different cells expressing DAT. The cells were exposed to 10 μM APP<sup>+</sup> for 15 seconds at a holding potential of - 60 mV. **F.** Comparison of the slopes for the two conditions (open circles - 0 mM K<sub>in</sub><sup>+</sup>; open squares- 160 mM K<sub>in</sub><sup>+</sup>) (n = 14; each). The difference in APP<sup>+</sup>

uptake between the two groups were not different ( $p = 0.53$ ; Mann-Whitney test). G. Slope of APP<sup>+</sup> fluorescence measured at - 90 mV, - 60 mV, - 30 mV, 0 mV and + 30 mV in the absence of K<sub>in</sub><sup>+</sup> (open circles-  $n = 8$ ; error bars are SD). The slopes were normalized to the slope at - 90 mV. For comparison we show the fit to the data in Fig.1E (160 mM K<sub>in</sub><sup>+</sup> – black dashed line).

**Fig. 5.** Binding of K<sup>+</sup> to the inward facing conformation of DAT is voltage-dependent. **A.** Representative traces of dopamine-induced currents through DAT measured in the voltage range from - 60 mV to + 10 mV. The currents were evoked with 30  $\mu$ M dopamine. The intracellular solution contained 160 mM K<sup>+</sup>. The traces show the first 200 ms of the current at the indicated potentials. **B.** Normalized peak currents in the presence of 160 mM K<sub>in</sub><sup>+</sup> (open triangles;  $n = 6$ ) as a function of voltage. The green line is a Boltzmann fit through the data points. The valence was 0.38 (95% confidence interval: 0.05 – 2). We obtained this estimate imposing the following constraints onto the fit: (i) top value < zero; (ii) shared V<sub>50</sub> between data sets. The dashed blue line (i.e. fit from the data in Fig. 3F - 0 mM Na<sub>in</sub><sup>+</sup>/ K<sub>in</sub><sup>+</sup>) was added for comparison. **C.** Normalized peak current amplitude as a function of voltage with 160 mM Li<sup>+</sup> present intracellularly (open diamonds;  $n = 6$ ). The red solid line is the fit of the data to the Boltzmann equation. The valence was 1.23 (95% confidence interval: 0.60 - 2.41) and V<sub>50</sub> = - 24.5 mV (95% confidence interval: - 36.5 - - 12.5 mV). The dashed black and green lines are the fits for 152 mM Na<sub>in</sub><sup>+</sup> and 160 mM K<sub>in</sub><sup>+</sup>, respectively (*cf.* Fig. 3F and Fig. 5B). **D. E. and F.** are the results obtained from applying “two pulse protocols” at - 50 mV (black open circles), 0 mV (red open squares) and + 20 mV (blue open triangles). The tested conditions were 160 mM K<sub>in</sub><sup>+</sup>/6 mM Na<sub>in</sub><sup>+</sup> in D., 0 mM K<sub>in</sub><sup>+</sup>/0 mM Na<sub>in</sub><sup>+</sup> in E. and 160 mM K<sub>in</sub><sup>+</sup>/0 mM Na<sub>in</sub><sup>+</sup> in F. ( $n = 6$ ; each). The solid lines in black, red and blue were drawn by fitting the data to the equation for a mono-exponential rise. The rates in D. were 2.16 s<sup>-1</sup> (95% confidence interval: 1.93 - 2.39 s<sup>-1</sup>), 3.08 s<sup>-1</sup> (95% confidence interval: 2.39-3.78 s<sup>-1</sup>) and 6.77 s<sup>-1</sup> (95% confidence interval: 4.60 - 8.93 s<sup>-1</sup>) for - 50 mV, 0 mV and + 20 mV, respectively. The rates in E. were 3.40 s<sup>-1</sup> (95% confidence interval: 2.79 - 4.01 s<sup>-1</sup>), 3.99 s<sup>-1</sup> (95% confidence interval: 3.05 - 4.93 s<sup>-1</sup>) and 5.71 s<sup>-1</sup> (95% confidence interval: 4.47 - 6.95 s<sup>-1</sup>) for - 50 mV, 0 mV and + 20 mV, respectively. The rates in F. were 3.14 s<sup>-1</sup> (95% confidence interval: 2.62 - 3.66 s<sup>-1</sup>), 3.38 s<sup>-1</sup> (95% confidence interval: 2.73- 4.03 s<sup>-1</sup>) and 4.92 s<sup>-1</sup> (95% confidence interval: 3.80 - 6.04 s<sup>-1</sup>) for - 50 mV, 0 mV and + 20 mV, respectively. **G.** Comparison of APP<sup>+</sup> uptake (10  $\mu$ M) at a low and a high Cl<sub>in</sub><sup>-</sup> concentration. Shown are the slopes measured with 0.5 mM Cl<sub>in</sub><sup>-</sup> (open circles;  $n = 7$ ) and with 142 mM Cl<sub>in</sub><sup>-</sup> (open squares;  $n = 8$ ) at - 60 mV. The slopes were not different ( $p = 0.93$ ; Mann Whitney test) **H.** Peak current recovery at - 50 mV. Shown are normalized peak current amplitudes as a function of the time interval between the reference and the test pulse. Currents were elicited by rapid application of 30  $\mu$ M dopamine. Open circles ( $n = 6$ ) show the peak current recovery with 0.5 mM Cl<sub>in</sub><sup>-</sup> and open squares ( $n = 6$ ) the peak current recovery with 142 mM Cl<sub>in</sub><sup>-</sup>. The solid black and green line indicate fits of a mono-exponential function to the data points. With 0.5 mM Cl<sub>in</sub><sup>-</sup> the recovery rate was 2.49 s<sup>-1</sup> (95% confidence interval: 2.14 – 2.83 s<sup>-1</sup>); with 142 mM Cl<sub>in</sub><sup>-</sup> the recovery rate was 3.04 s<sup>-1</sup> (95% confidence interval: 2.49 – 2.59 s<sup>-1</sup>). Difference in these rates was not statistically significant ( $p = 0.086$ ; F-test).

**Fig. 6.** A kinetic model of the transport cycle of DAT. **A.** Schematic representation of the transport cycle. Shaded in grey is the original scheme proposed by Erreger et al. (2008), which is nested in our refined scheme. The letter T stands for transporter, the subscripts o, i, occ and cond stand for outward facing inward facing, occluded and conducting state, respectively. The annex Cl, Na, K indicate when the corresponding ion is bound; the annex S when a substrate is bound. We parameterized substrate binding by using different sets of rate constants for APP<sup>+</sup> and dopamine. The z values indicated in red are the valences, which are ascribed to 6 partial reactions. All other reactions were assumed to be voltage-

independent. Indicated in blue is the conducting state, which was modeled as a selective pore for  $\text{Na}^+$  ions. **B.** The upper panel, shows the simulated current component produced by  $\text{Na}^+$  ions dissociating into the cytosol (calculated for voltages ranging from -60 mV to +30 mV). The panel in the middle shows the current component produced by incoming  $\text{K}^+$  ions (also for voltages ranging from -60 mV to +30 mV). The lower panel shows the sum of the two. It is evident that the two currents cancel each other out. **C.** Simulated currents induced by dopamine (30  $\mu\text{M}$ ) in the presence and absence of 160 mM  $\text{K}_{\text{in}}^+$ . **D.** Voltage-dependence of the steady current component with and without 160 mM  $\text{K}_{\text{in}}^+$  (upper panel). In the lower panel we show the open-probability of the conducting state as a function of voltage. The conducting state is gated by voltage. **E.** Simulated uptake of 10  $\mu\text{M}$   $\text{APP}^+$  in the presence and absence of 160 mM  $\text{K}_{\text{in}}^+$ , in the upper and lower panel, respectively. Uptake was simulated for voltages ranging from -60 mV to +30 mV. There is little effect of  $\text{K}_{\text{in}}^+$  on  $\text{APP}^+$  uptake.

**Figure 1**

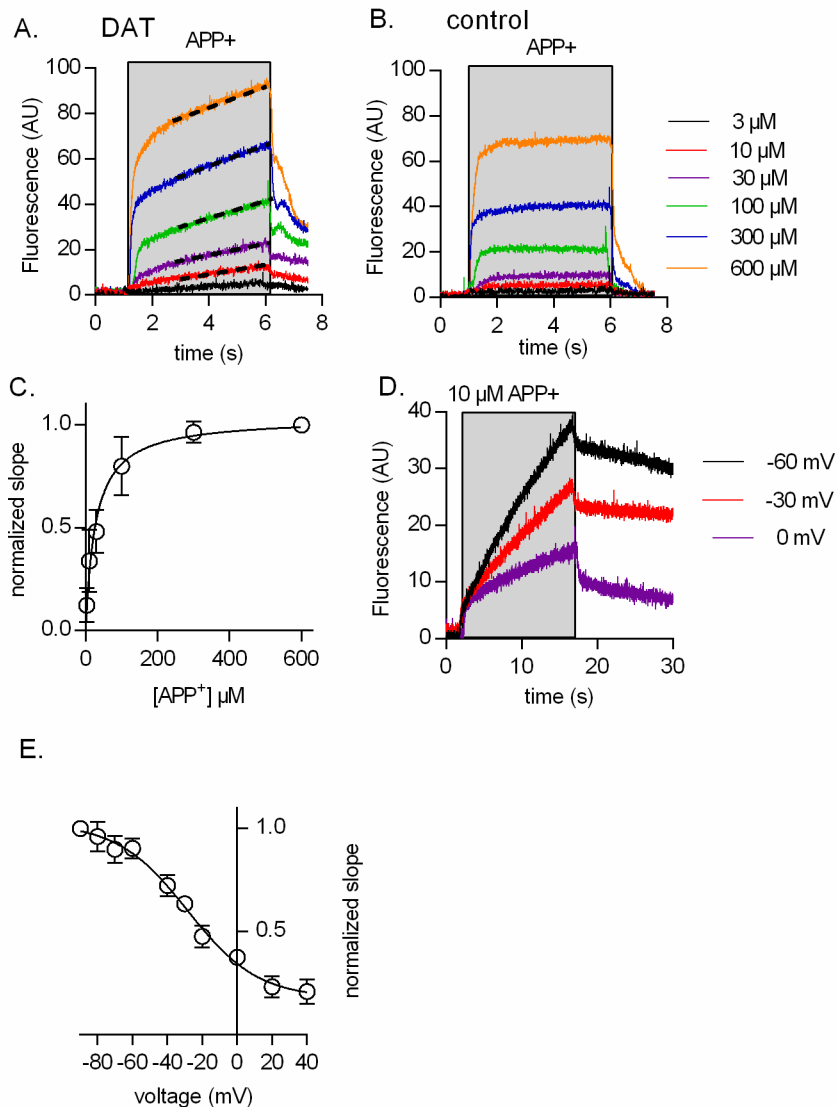

**Figure 2**

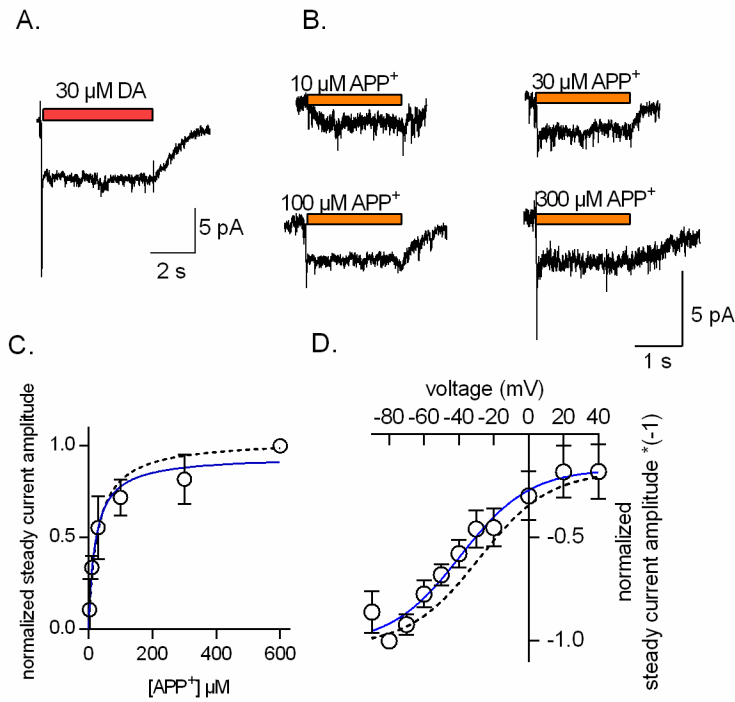

**Figure 3**

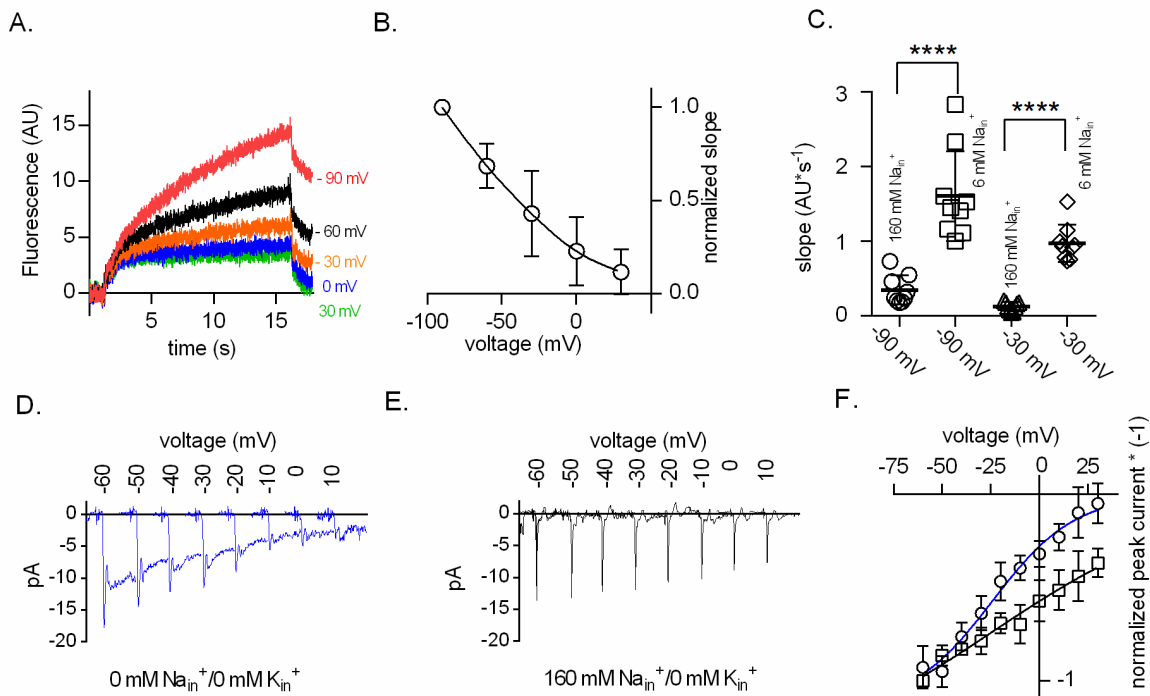

Figure 4

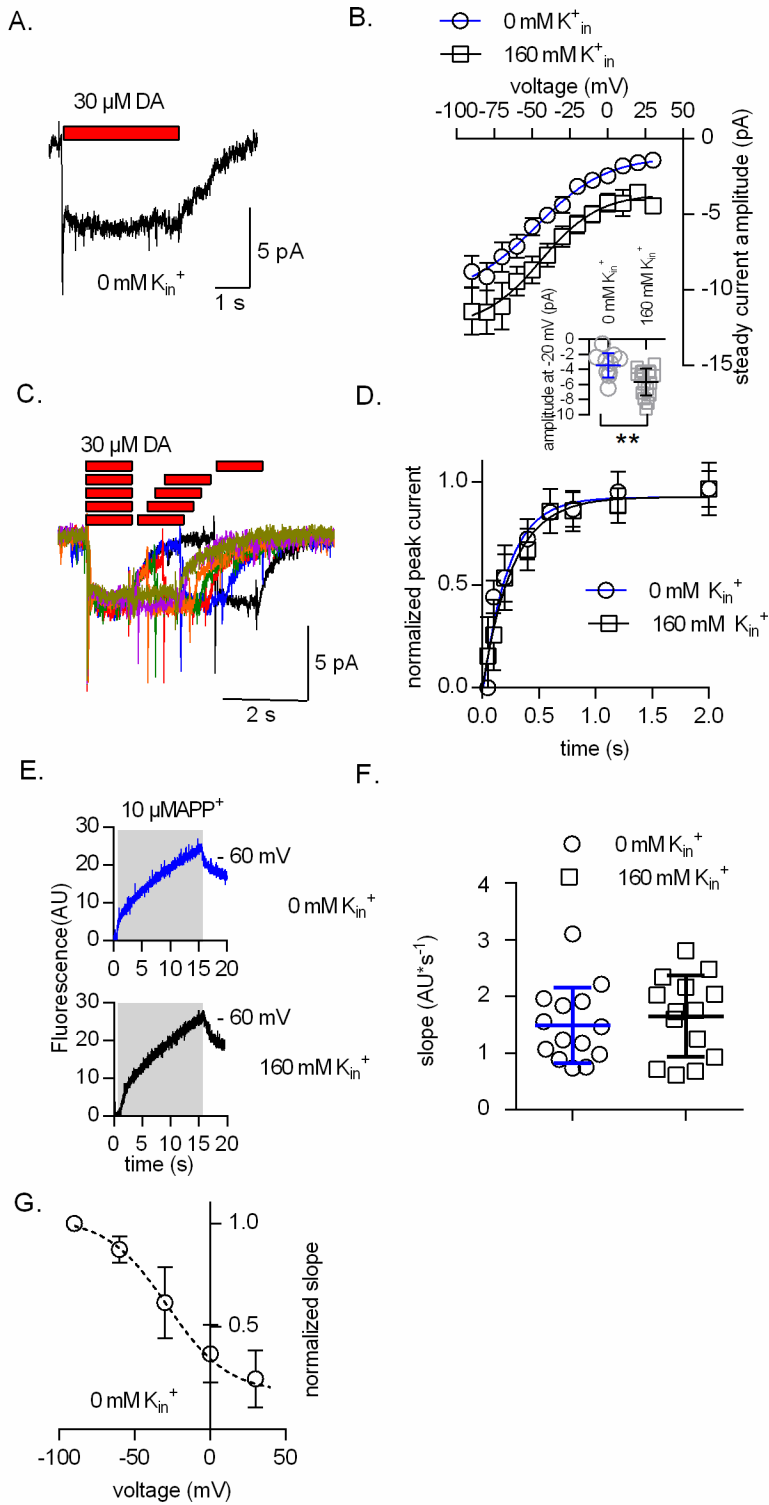

**Figure 5**

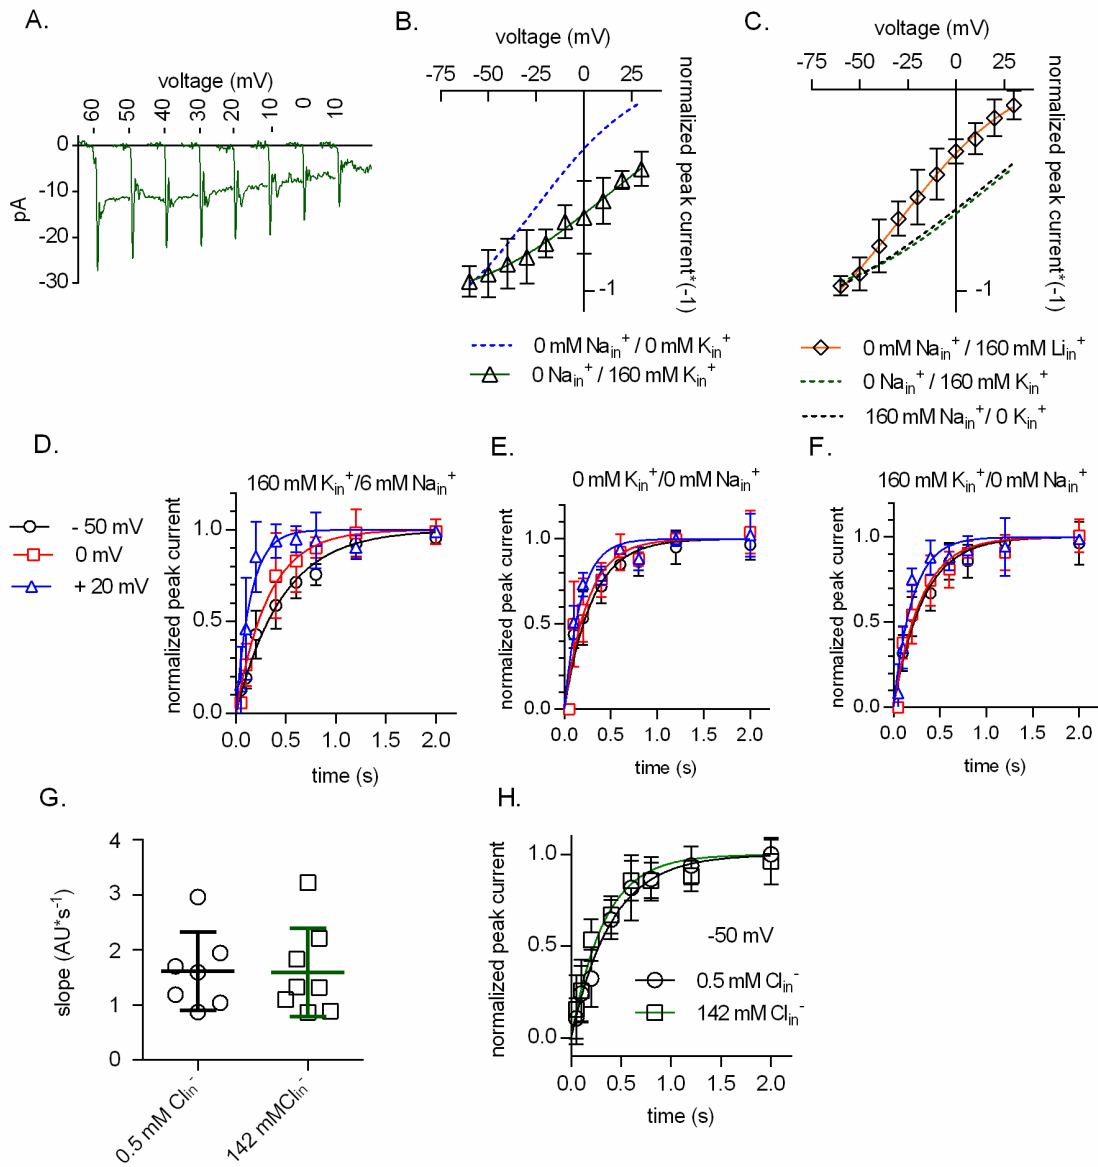

Figure 6

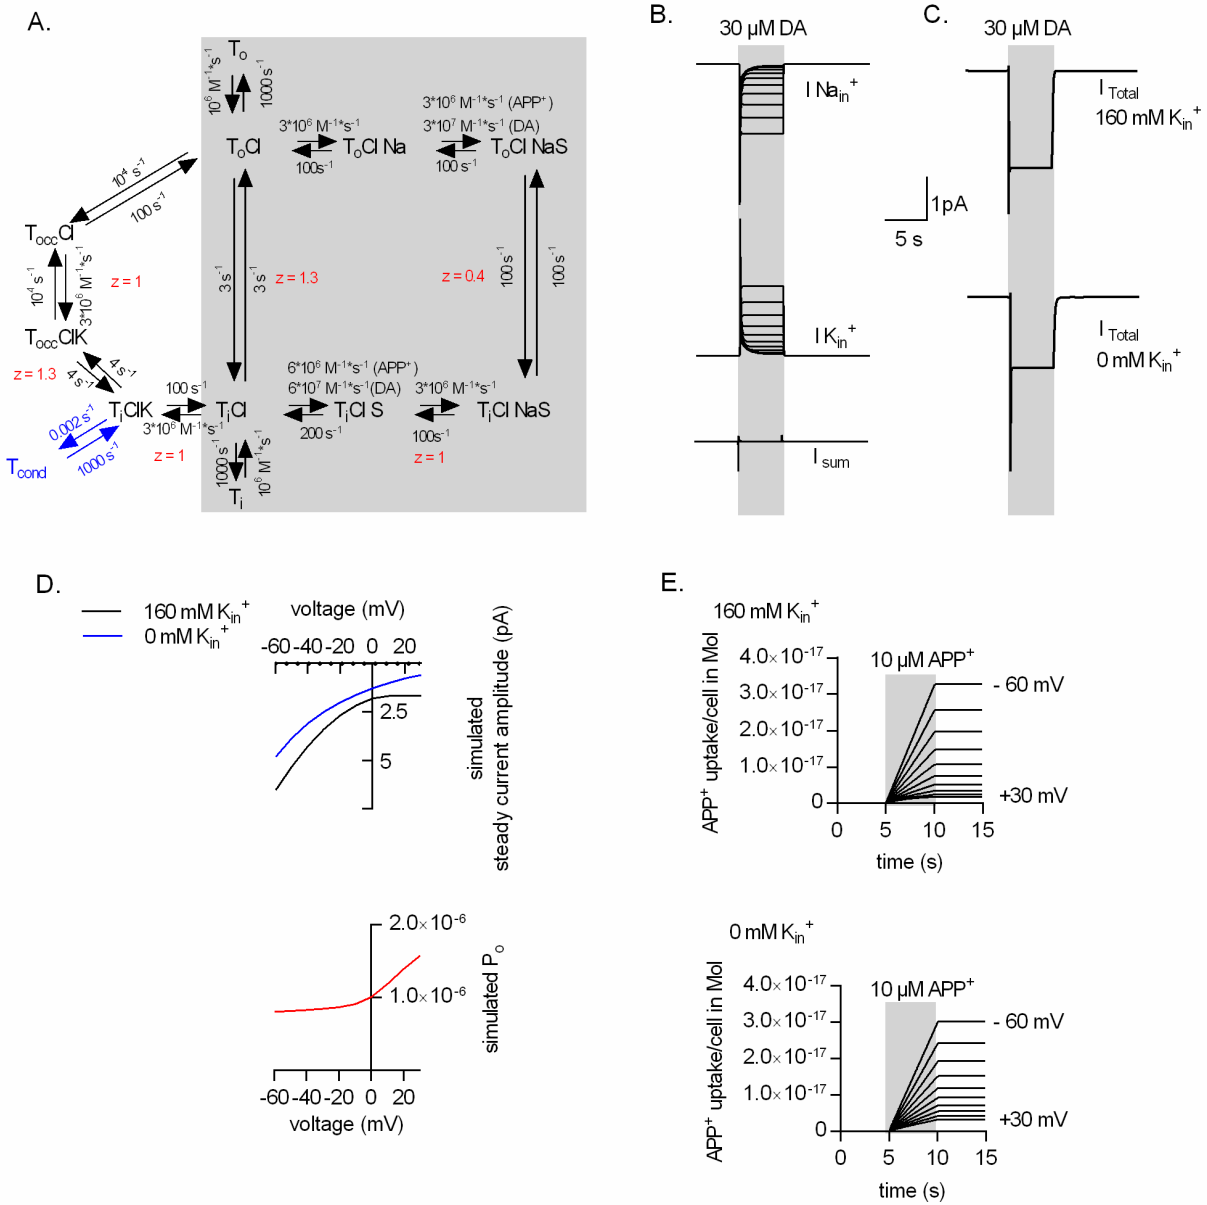

Source: https://www.biorxiv.org/content/10.1101/2020.07.09.196642v1.full.pdf
